# Supplementary figures and images for: Prediction of the Be2B2monolayer: an ultrahigh capacity anode material for Li-ion and Na-ion batteries
Source: Royal Society of Chemistry journal article supplement (doi:10.1039/d2cp00690a), 2022-01-01

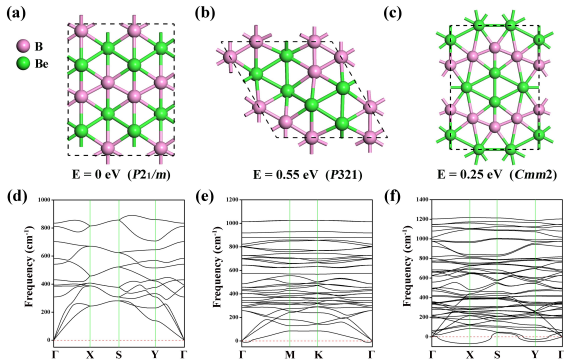

Supplement: d2cp00690a2.pdf [file d2cp00690a2.pdf]

**(a)**

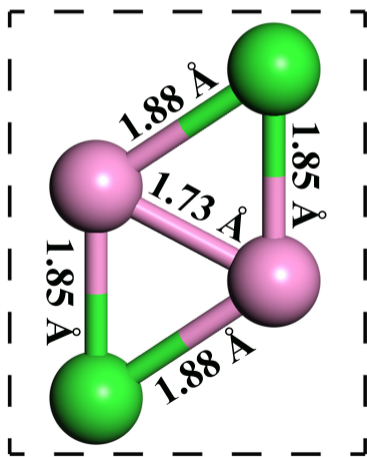

**(b)**

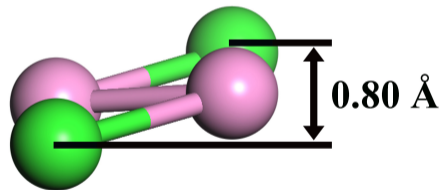

Supplement: d2cp00690a3.pdf [file d2cp00690a3.pdf]
